# Supplementary figures and images for: Meta-analysis and systematic review of the association between adverse childhood events and irritable bowel syndrome
Source: HighWire-hosted journal article supplement (doi:10.1136/jim-2021-002109), 2022-01-27

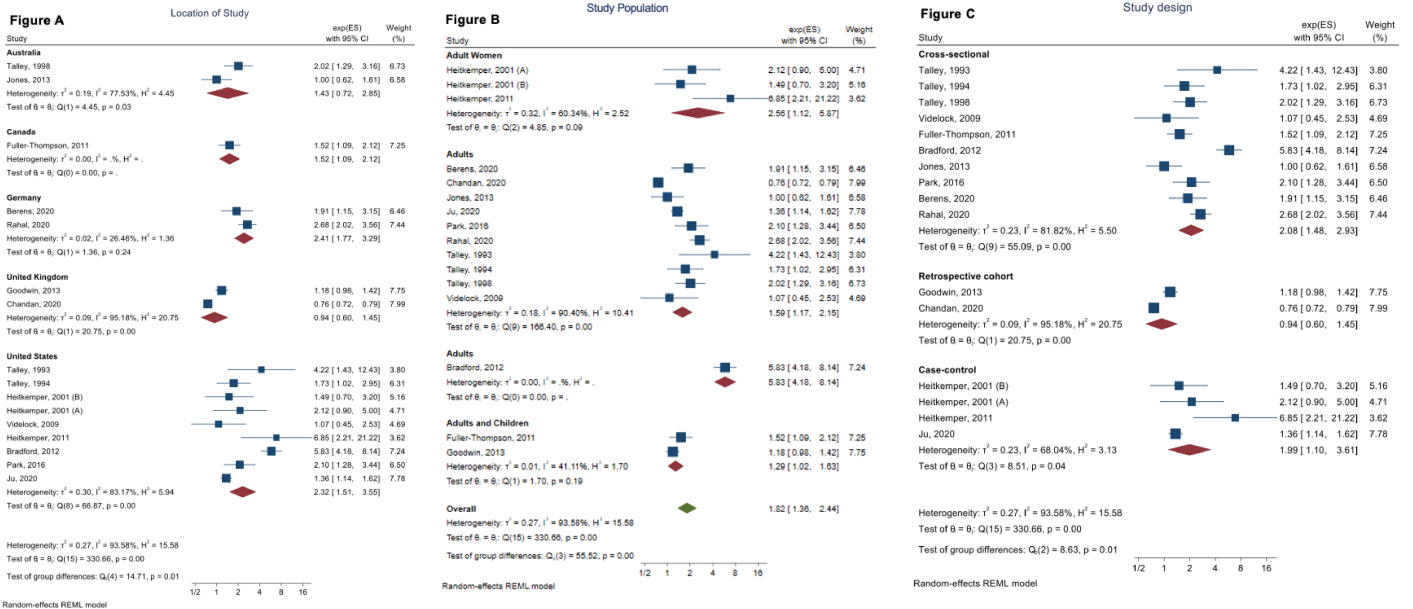

Supplement: jim-2021-002109supp002_data_supplement.pdf [file jim-2021-002109supp002_data_supplement.pdf]
